# Supplementary material for: Inhibition of D-2HG leads to upregulation of a proinflammatory gene signature in a novel HLA-A2/HLA-DR1 transgenic mouse model of IDH1R132H-expressing glioma
Source: PubMed Central journal article supplement — J Immunother Cancer. 2022 May 23;10(5):e004644. doi: 10.1136/jitc-2022-004644 (PMC9174833; doi:10.1136/jitc-2022-004644), 2022-05-23
Supplement: jitc-2022-004644supp001.pdf [file jitc-2022-004644supp001.pdf]

**Generation of IDH1m HLA.A2/DR1 (dTG)-syngeneic tumor cell line**

Primary astrocytes isolation<sup>1</sup>: cortical tissue from the brain of 4 neonatal dTG mice was dissected and incubated with 0.25% Trypsin to generate a single-cell suspension. The cells were washed, resuspended in astrocyte culture medium (DMEM + 10% FBS + 1% P/S), and plated in a flask coated with poly-L-lysine. Media was changed 2 days later and again every 3 days for a total of 11 days when the adherent cells reached confluency. The resulting astrocyte culture was depleted of microglia using the CD11b microbeads magnetic cell sorting kit (Miltenyi Biotec, #130-049-601) following the manufacturer's protocol.

Astrocytes transformation:  $3 \times 10^5$  cells were plated per well in a 6-well plate pre-coated with poly-L-lysine. The following day, the cells were transfected using FuGENE HD (Promega, #E2311) with 0.5  $\mu$ g/well pT2/C-Luc/PGK-SB1.3 (Addgene plasmid #20207), 0.5  $\mu$ g/well pT/Caggs-NrasV12 (Addgene #20205), 0.5  $\mu$ g/well pT2/shp53/GFP4/mPDGF $\beta$  (a gift from Dr. John Ohlfest), and 1.5  $\mu$ g/well pT3.5/Caggs-HsIDH1R132H (a gift from Dr. David Largaespada) following Promega's protocol. After several passages, transformed colonies were observed. To isolate a uniform population, the resulting pool of transformed cells underwent single-cell cloning. Multiple clones were screened for the expression of IDH1m and GFP *in vitro* and their ability to reproducibly form tumors *in vivo*. Cells isolated *ex-vivo* were expanded, maintained in complete DMEM (includes 10% FBS, 1% P/S, 1mM Na-Pyr, 1X NEAA, 2mM GlutaMAX, and 10mM HEPES) and were used in the remainder of the studies (referred to as dTG-IDH1<sup>R132H</sup>). For experiments evaluating responses to Class I TAAs, the dTG-IDH1<sup>R132H</sup> cells were transduced with a MMLV retroviral construct expressing the hgp100<sub>(209–217)</sub>, hTYR<sub>(368–376)</sub>, and h/mTRP2<sub>(180–188)</sub> peptides (Fig. 5E), and a blasticidin resistance gene. The plasmid was synthesized by VectorBuilder. The resulting dTG-IDH1<sup>R132H</sup>-TAA<sup>+</sup> cells (Fig. 5D) were selected using 10  $\mu$ g/ml blasticidin (maintenance 5  $\mu$ g/ml).

## **Pharmacodynamics and pharmacokinetic analyses**

### In vitro (Cell Pellet) LC-MS/MS Analysis

Cell pellets were lysed with 170- $\mu$ L of methanol:water (80:20 [v/v]).

- AG-881:

Calibration standards and quality control (QC) samples were prepared in methanol:water (80:20 [v/v]). A 10  $\mu$ L aliquot of calibration standards and QCs was mixed with 120  $\mu$ L of methanol:water (80:20 [v/v]) in a 96-well plate. Cell lysate (130  $\mu$ L) was aliquoted into the plate. All samples were mixed with 250  $\mu$ L of acetonitrile containing internal standard AGI-0028187 (1 ng/mL) for protein precipitation. The mixture was vortexed at 800 rpm for 4 min and centrifuged at 4000 rpm, at 4°C for 10 min. A 300  $\mu$ L aliquot of supernatant was transferred to a clean plate and dried down. The dried extract was reconstituted in 100  $\mu$ L acetonitrile:water:formic acid (50:50:0.1 [v/v/v]), and 1  $\mu$ L of the final sample was injected onto the LC-MS/MS system for analysis which was carried out on a SCIEX Triple Quad™ 6500+ with Exion LC™ AD system. A reversed-phase gradient method using a Waters ACQUITY UPLC HSS T3 Column (100Å, 1.8 $\mu$ m, 2.1 mm X 50 mm) maintained at 50 °C, provided chromatographic separation. Mobile phases A and B used were water with 0.1% formic acid and acetonitrile with 0.1% formic acid respectively, at a total flow rate of 600  $\mu$ L/min. AG-881 and its internal standard were ionized under a positive ion electrospray mode and monitored using the multiple-reaction monitoring (MRM) transitions of m/z 459.1→260.2 and m/z 421.0→266.1. The peak area ratios of analyte relative to internal standard were used for AG-881 quantitation. Linearity was achieved in the AG-881 concentration range from 1 ng/mL to 30,000 ng/mL. A concentration factor of 13X was factored into final calculated concentrations.

- 2-HG:

Calibration standards and quality control (QC) samples were prepared in methanol:water (80:20 [v/v]). A 30  $\mu$ L aliquot of cell lysate, calibration standards and QCs was mixed with 30  $\mu$ L of internal standard ([<sup>13</sup>C<sub>5</sub>]2-HG, 200 ng/mL), followed by protein precipitation with 200 $\mu$ L of

acetonitrile. The mixture was vortexed and centrifuged and an aliquot of 180  $\mu\text{L}$  of supernatant was transferred to a clean plate and dried down. The dried extract was reconstituted in 200  $\mu\text{L}$  acetonitrile:water:formic acid (25:75:0.1 [v/v/v]), and 10  $\mu\text{L}$  of the final sample was injected onto a SCIEX 4000QTRAP™ with Waters ACQUITY UPLC® LC-MS/MS system for analysis. Chromatographic separation was performed using a gradient elution on a Thermo Scientific™ Hypersil GOLD™ aQ C18 Polar Endcapped Column (175Å, 3  $\mu\text{m}$ , 3  $\times$  100mm) maintained at 40 °C. Water with 0.1% formic acid and acetonitrile with 0.1% formic acid were used as mobile phase A and B respectively at a total flow rate of 700  $\mu\text{L}/\text{min}$ . MS detection was done on electrospray ionization, negative ion mode and the MRM transitions of  $m/z$  147.0/129.0 and  $m/z$  152.0/134.0 were monitored for 2-HG and [ $^{13}\text{C}_5$ ]2-HG respectively. The peak area ratios of the analyte relative to the internal standard were used for 2-HG quantitation. Linearity was achieved in the 2-HG concentration range from 1 ng/mL to 30,000 ng/mL in methanol:water (80:20 [v/v])

#### *In vivo* (Plasma/tissue) LC-MS/MS Analysis (AG-881)

A non-validated protein precipitation method was used for analysis of AG-881 in plasma samples. Calibration standards and quality control (QC) samples were prepared in blank mouse plasma. Brain/tumor samples were homogenized using a FastPrep homogenizer, with 10 volumes (volume-by-weight [v/w]) of homogenizing solution (80:20 methanol in water [v/v]) to get a homogenate with a dilution factor of 11. A 10- $\mu\text{L}$  aliquot of calibration standards, QCs, unknown plasma and tissue homogenate were mixed with 200  $\mu\text{L}$  of acetonitrile containing the stable labeled internal standard (IS) AGI-0028187 at 25 ng/mL, for protein precipitation. The mixture was vortexed and centrifuged. A 100  $\mu\text{L}$  aliquot of supernatant was mixed with 100  $\mu\text{L}$  of water with 0.1% formic acid and vortexed to mix. A 5  $\mu\text{L}$  injection volume was analyzed on a SCIEX Triple Quad™ 6500+ with Exion LC™ AD system. A reversed-phase gradient method using a Waters ACQUITY UPLC HSS T3 Column (100Å, 1.8 $\mu\text{m}$ , 2.1 mm X 50 mm) maintained at 50 °C, provided chromatographic separation. Water with 0.1% formic acid and acetonitrile with 0.1% formic acid were used as mobile phase A and B respectively, at a total flow rate of

600  $\mu\text{L}/\text{min}$ . AG-881 and its internal standard were ionized under a positive ion electrospray mode and monitored using the multiple-reaction monitoring (MRM) transitions of  $m/z$  459.1 $\rightarrow$ 260.2 and  $m/z$  421.0 $\rightarrow$ 266.1. The peak area ratios of analyte relative to internal standard were used for AG-881 quantitation. Linearity was achieved in the AG-881 concentration range from 1 ng/mL to 30,000 ng/mL.

#### *In vivo* (Tissue) LC-MS/MS Analysis (2-HG)

The concentrations of 2-HG in brain/tumor were determined using a qualified LC-MS/MS method. Tissue samples were homogenized using a FastPrep homogenizer with 10 volumes (volume-by-weight [v/w]) of methanol:water (80:20 [v/v]) to get a homogenate with a dilution factor of 11. Calibration standards and quality control samples for 2HG were prepared in surrogate matrix methanol:water (80:20 [v/v]). In a 96-well plate, 30  $\mu\text{L}$  aliquot of calibration standards, quality control samples, tissue homogenates were mixed with 30  $\mu\text{L}$  internal standard ( $[^{13}\text{C}_5]$ 2-HG at 200 ng/mL) followed by addition of 200  $\mu\text{L}$  of acetonitrile to each sample for protein precipitation. The mixture was vortexed and centrifuged, and 200  $\mu\text{L}$  of supernatant was transferred to a clean plate and dried down under vacuum followed by reconstitution in 150  $\mu\text{L}$  acetonitrile:water:formic acid (25:70:0.1 [v/v/v]). A 5  $\mu\text{L}$  aliquot of the final samples were injected for analysis on a SCIEX 4000QTRAP<sup>TM</sup> with Waters ACQUITY UPLC<sup>®</sup>.

Chromatographic separation was performed using a gradient elution on a Thermo Scientific<sup>TM</sup> Hypersil GOLD<sup>TM</sup> aQ C18 Polar Endcapped Column (175 $\text{\AA}$ , 3  $\mu\text{m}$ , 3  $\times$  100mm). The column temperature was kept at 40  $^{\circ}\text{C}$ . Water with 0.1% formic acid and acetonitrile with 0.1% formic acid were used as mobile phase A and B respectively at a total flow rate of 700  $\mu\text{L}/\text{min}$ .

Electrospray ionization method for MS detection was used on negative ion mode and the MRM transitions monitored for 2-HG and  $[^{13}\text{C}_5]$ 2-HG were  $m/z$  147.0/129.0 and  $m/z$  152.0/134.0 respectively. The peak area ratios of the analyte relative to the internal standard were used for 2-HG quantitation. Linearity was achieved in the 2-HG concentration range from 1 ng/mL to 30,000 ng/mL in methanol:water (80:20 [v/v]).

### *In vivo* (Plasma) LC-MS/MS Analysis (2-HG)

A qualified LC-MS/MS method with surrogate analyte approach was used to quantitate 2-HG in mouse plasma samples. Surrogate analyte ( $[^{13}\text{C}_5]$ 2-HG) was used to prepare calibration standards and quality control samples in blank mouse plasma matrix. A 30- $\mu\text{L}$  aliquot of calibration standards, quality control samples and unknown plasma samples was mixed with 30  $\mu\text{L}$  internal standard ( $[^{13}\text{C}_5\text{D}_5]$ 2-HG at 1000 ng/mL) and further precipitated with 200  $\mu\text{L}$  of acetonitrile. The mixture was vortexed and centrifuged and a 200- $\mu\text{L}$  aliquot of supernatant was transferred to a clean plate and dried down. The dried extract was reconstituted in 150  $\mu\text{L}$  acetonitrile-water-formic acid (25:75:0.1 [v/v/v]), and a 10-  $\mu\text{L}$  aliquot was injected onto an LC-MS/MS system, SCIEX 4000QTRAP™ with Waters ACQUITY UPLC®, for analysis. A Thermo Scientific™ Hypersil GOLD™ aQ C18 Polar Endcapped Column (175Å, 3  $\mu\text{m}$ , 3  $\times$  100mm), maintained at 40 °C, was used for chromatographic separation of analytes. Water with 0.1% formic acid and acetonitrile with 0.1% formic acid were used as mobile phase A and B respectively for gradient elution, at a total flow rate of 700  $\mu\text{L}/\text{min}$ . MS detection was done on electrospray ionization, negative ion mode and the MRM transitions monitored for 2-HG,  $[^{13}\text{C}_5]$ 2-HG and  $[^{13}\text{C}_5\text{D}_5]$ 2-HG were m/z 147.0/129.0, m/z 152.0/134.0 and m/z 157.00/139.10 respectively. The peak area ratios of the surrogate analyte relative to the internal standard were used for 2-HG quantitation. Linearity for  $[^{13}\text{C}_5]$ 2-HG was achieved in the concentration range from 10 to 30,000 ng/mL in mouse plasma.

### ***Nanostring data normalization and analysis***

Background correction was performed with the Background Thresholding option in nSolver software (v4.0), whereby a threshold count value was set to 11, and all counts which fell below that value were adjusted to match it. All the subsequent computational analyses were performed using R (v4.0.3). For the subsequent differential expression (DE) analysis, the factors of

unwanted variation were estimated based on the housekeeping genes and implemented into the design matrix, according to the RUVSeq workflow.<sup>2</sup> DE analysis was performed with the aforementioned design matrix using the DESeq2 R package (v1.30.0).<sup>3</sup> For multiple testing, p-values were adjusted with the Benjamini-Hochberg method.

### **Flow cytometry**

Single cell suspensions ( $0.5\text{-}1 \times 10^6$  cells) of spleens, lymph nodes, BILs, or TILs were pre-incubated with blocking solution (BioLegend, 156604). After 10 min, a cocktail of fluorophore-conjugated antibodies resuspended in 50  $\mu$ l FC buffer (1X PBS, 0.5% FBS, 2 mM EDTA) was added directly to each tube, and samples were incubated at 4°C for 20 min in the dark. Samples were washed with excess buffer and resuspended for analysis. Samples were analyzed using Invitrogen Attune NxT (Thermo Fisher Scientific).

### **ELISpot assay**

Following completion of the study, available samples from each treatment group were thawed, and TILs were isolated by subsequently enriching the cell suspensions for leukocytes through a 70%/30% Percoll gradient separation, followed by depletion of CD11b<sup>+</sup> leukocytes using the CD11b microbeads magnetic cell sorting kit (Miltenyi Biotec). The resulting CD11b<sup>-</sup> TILs were added to peptide-loaded APCs and co-cultured at 37°C for 7 days. APCs were prepared from the splenocytes of naïve 6-10-week-old dTG mice by depletion of CD3<sup>+</sup> lymphocytes using the Mouse CD3 T-cell Positive Selection Kit (BioLegend, #480031) followed by 18hrs treatment with 50ng/ml IFN $\gamma$ . Prior to co-culture with TILs, class I (TAAs) or class II (R132H) peptides were added to the APC suspension at 10 $\mu$ g/ml. After 7 days, viable lymphocytes were collected and counted from the *ex vivo* restimulation cultures. IFN $\gamma$  ELISpot assay (Mouse IFN $\gamma$  ELISpot Kit, R&D Systems, EL485) was performed by co-culturing  $2 \times 10^4$  restimulated TILs with freshly prepared peptide-pulsed APCs at a 1:5 (TIL:APC) ratio for 36hrs at 37°C. Media only and each cell type cultured alone were used as negative controls and TILs + 1X cell activation cocktail (BioLegend, 423302) was used as a positive control. IFN $\gamma$  spots were developed according to

the kit's manufacturer protocol. Spots were imaged and quantified using the CTL S6 Universal-V Analyzer ELISpot Reader (ImmunoSpot).

1. Schildge S, Bohrer C, Beck K, et al. Isolation and culture of mouse cortical astrocytes. *J Vis Exp* 2013(71) doi: 10.3791/50079 [published Online First: 2013/02/06]
2. Risso D, Ngai J, Speed TP, et al. Normalization of RNA-seq data using factor analysis of control genes or samples. *Nat Biotechnol* 2014;32(9):896-902. doi: 10.1038/nbt.2931 [published Online First: 2014/08/26]
3. Love MI, Huber W, Anders S. Moderated estimation of fold change and dispersion for RNA-seq data with DESeq2. *Genome Biol* 2014;15(12):550. doi: 10.1186/s13059-014-0550-8 [published Online First: 2014/12/18]
