# Supplementary material for: Inhibition of D-2HG leads to upregulation of a proinflammatory gene signature in a novel HLA-A2/HLA-DR1 transgenic mouse model of IDH1R132H-expressing glioma
Source: PubMed Central journal article supplement — J Immunother Cancer. 2022 May 23;10(5):e004644. doi: 10.1136/jitc-2022-004644 (PMC9174833; doi:10.1136/jitc-2022-004644), 2022-05-23
Supplement: jitc-2022-004644supp002.pdf [file jitc-2022-004644supp002.pdf]

**Supplemental Table 1: Antibodies used in flow cytometry analyses**

|            | Clone     | Manufacturer |
|------------|-----------|--------------|
| CD45       | 30-F11    | Biolegend    |
| CD3        | 145-2C11  | Biolegend    |
| CD4        | RM4-5     | Biolegend    |
| CD8        | 54-6.7    | Biolegend    |
| PD-1       | 29F.1A12  | Biolegend    |
| Tim3       | RMT3-23   | Biolegend    |
| LAG-3      | C9B7W     | Biolegend    |
| KLRG1      | 2F1/KLRG1 | Biolegend    |
| CD11b      | M1/70     | Biolegend    |
| CD11c      | N418      | Biolegend    |
| PD-L1      | 10F.9G2   | Biolegend    |
| F4/80      | BM8       | Biolegend    |
| Ly-6C      | HK1.4     | Biolegend    |
| Ly-6G      | 1A8       | Biolegend    |
| XCR1       | ZET       | Biolegend    |
| CD62L      | MEL-14    | Invitrogen   |
| CD44       | IM7       | Biolegend    |
| Ly-6G      | 1A8       | Biolegend    |
| XCR1       | ZET       | Biolegend    |
| Arginase I | A1exF5    | Biolegend    |
| CD206      | C068C2    | Biolegend    |
| CD86       | GL-1      | Biolegend    |
| HLA-DR     | L243      | Biolegend    |
| HLA-A2     | BB7.2     | Biolegend    |
|            |           |              |

**Supplemental Table 2: Antibodies used for *in vivo* treatments**

|                   | Clone     | Manufacturer | Catalog No | Administration                                                              |
|-------------------|-----------|--------------|------------|-----------------------------------------------------------------------------|
| anti-CD8 $\alpha$ | YTS 169.4 | BioXCell     | BE0117     | 200 $\mu$ g i.p. on days 3, 6, and 9;<br>100 $\mu$ g i.p. on days 16 and 21 |
| anti-CD4          | GK1.5     | BioXCell     | BP0003-1   | Same as anti-CD8 $\alpha$                                                   |
| anti-PD-1         | RMP1-4    | BioXCell     | BP0146     | 200 $\mu$ g 2x/week i.p. starting on day 5                                  |
| Rat IgG2a         | 2A3       | BioXCell     | BP0089     | Same as experimental group                                                  |
