# Supplementary material for: Inhibition of D-2HG leads to upregulation of a proinflammatory gene signature in a novel HLA-A2/HLA-DR1 transgenic mouse model of IDH1R132H-expressing glioma
Source: PubMed Central journal article supplement — J Immunother Cancer. 2022 May 23;10(5):e004644. doi: 10.1136/jitc-2022-004644 (PMC9174833; doi:10.1136/jitc-2022-004644), 2022-05-23

**Supplemental Figure 3: Antibody treatment regimen successfully depletes CD4<sup>+</sup> and CD8<sup>+</sup> T-cells**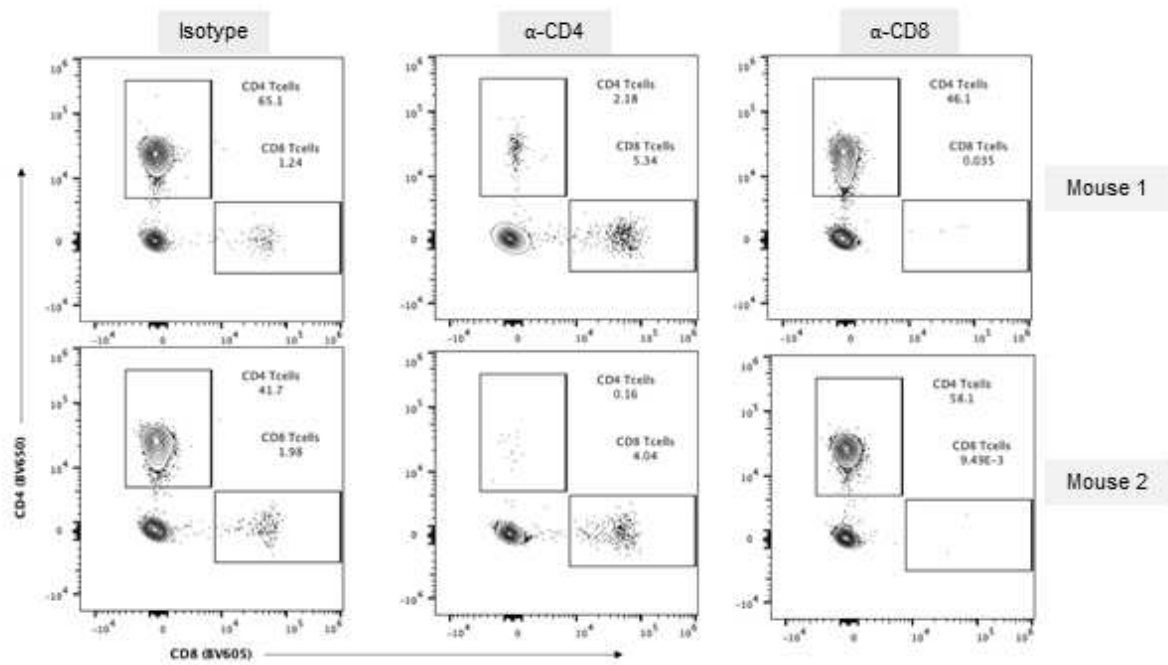

Supplement: jitc-2022-004644supp005.pdf [file jitc-2022-004644supp005.pdf]
