# Supplementary material for: Inhibition of D-2HG leads to upregulation of a proinflammatory gene signature in a novel HLA-A2/HLA-DR1 transgenic mouse model of IDH1R132H-expressing glioma
Source: PubMed Central journal article supplement — J Immunother Cancer. 2022 May 23;10(5):e004644. doi: 10.1136/jitc-2022-004644 (PMC9174833; doi:10.1136/jitc-2022-004644), 2022-05-23

## Supplemental Figure 4: Combined class I and II prophylactic vaccination increases R132Hp-specific activation of TILs ex vivo

A

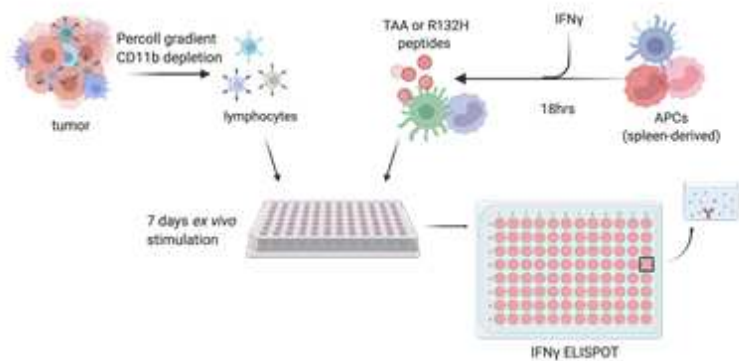

B

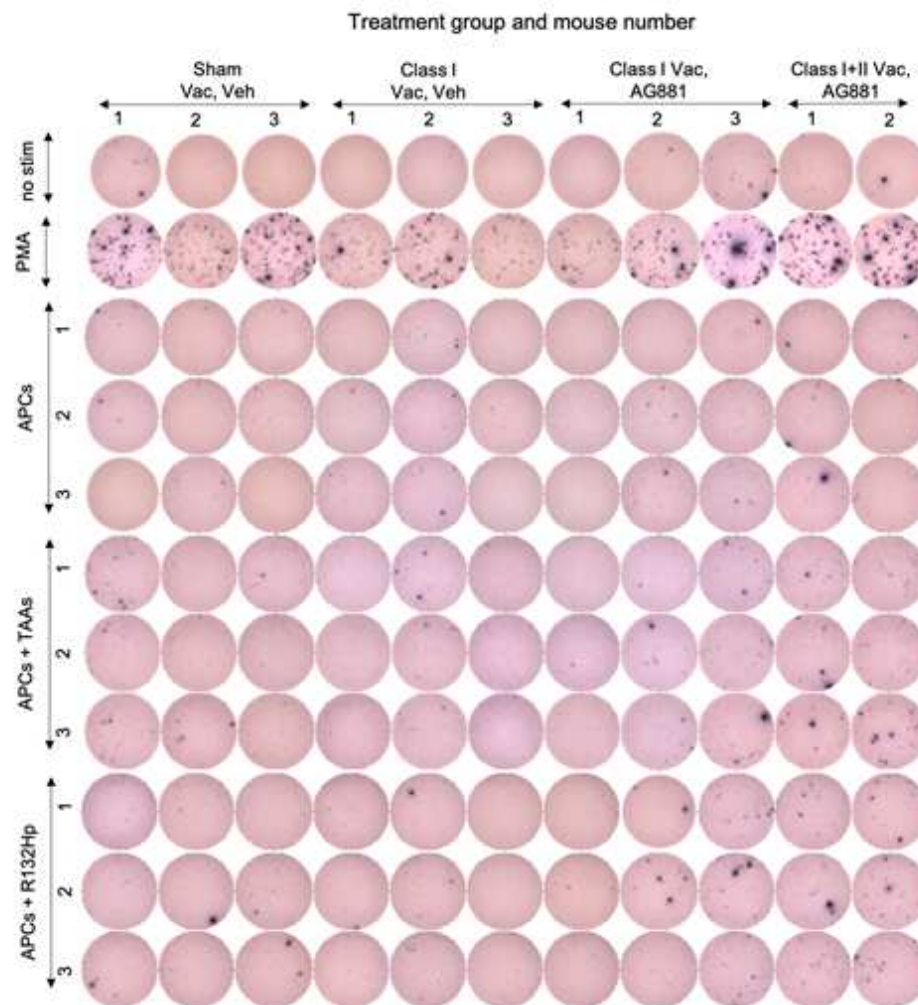

C

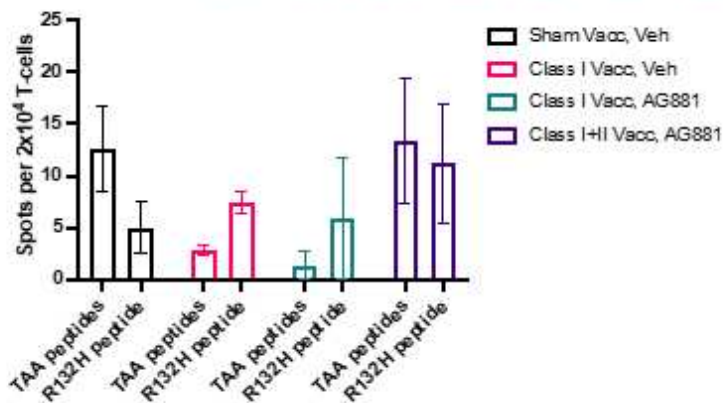

D

Tumor cells: HLA-DR expression

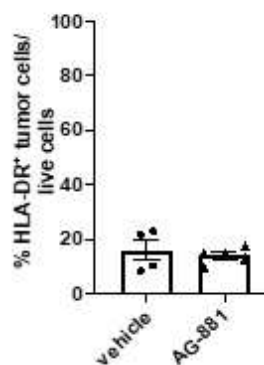

Supplement: jitc-2022-004644supp006.pdf [file jitc-2022-004644supp006.pdf]
